# Supplementary material for: Non-invasive in vivo optical monitoring of human placental oxygenation
Source: Research Square preprint supplement (doi:10.21203/rs.3.rs-139102/v1), 2021-01-14
Supplement: Supplementary file 1 [file P35V3.xlsx]

## Sheet: Sheet1
PatientID	35	3
wavelengths	808	786	830
Calibration
calibration water	6000
calibration intralipid	210
calibration ink	3
calibration file	P35V3_CALIBRATION_20191211_154744.txt
SN	2	3	4	5	6	7	8	9	10	11	12	1
SDS	1.5	2	3	4	5	6	7	7.5	8	8.5	9	0
start	4
end	5
measurement file	P35V3_20191211_145422.txt
Gestational Age	34

## Sheet: Sheet2
SN	Marker	TopLayerThickness	SecondLayerThickness	SuperficialLayerCurveDifference	start frame	end frame	situation
1	1.1	0	0	0	0	0	7	NO MEASUREMENT
2	1.2	0	0	0	0	0	7	NO MEASUREMENT
3	1.3	0	0	0	0	0	7	NO MEASUREMENT
4	2.1	0	0	0	0	0	7	NO MEASUREMENT
5	2.2	0	0	0	0	0	7	NO MEASUREMENT
6	2.3	0	0	0	0	0	7	NO MEASUREMENT
7	3.1	1.86	1.06	0.06	22	22	0
8	3.2	1.89	1.21	0.28	24.2	26.1	0
9	3.3	1.86	1.13	0.38	28	29	0
1	101	1.86	1.13	0.38	28	28	0
2	101	1.83	1.16	0.23	29	29	4	DRINKING WATER
3	101	1.83	1.16	0.23	30	30	4	lost SDS3
4	101	1.83	1.16	0.23	31	31	0
5	101	1.74	1.15	0.53	32	32	0
6	101	1.74	1.15	0.53	33	33	4	PLACENTA SURFACE BIG SLOPE
7	101	1.74	1.15	0.53	34	34	4	PLACENTA SURFACE BIG SLOPE
8	101	1.74	1.15	0.14	35	35	4	fitting failed
9	101	1.74	1.15	0.14	36	36	1	fitting failed
10	101	1.74	1.15	0.14	37	37	1	StO2 much bigger
11	102	1.74	1.15	0.14	38	38	1	fitting failed
12	102	1.74	1.15	0.14	39	39	1	fitting failed
13	102	1.74	1.15	0.14	40	40	1	BABY MOVE A LOT
14	102	1.73	1.09	0.22	41	41	1	StO2 much bigger
15	102	1.73	1.09	0.22	42	42	0
16	102	1.73	1.09	0.22	43	43	0
17	102	1.73	1.09	0.22	44	44	0
18	102	1.79	1.01	0.13	45	45	1	BABY MOVE A LOT
19	102	1.73	1.02	0.06	46	46	1	BABY MOVE A LOT
20	102	1.79	1.01	0.13	47	47	1
21	102	1.79	1.01	0.13	48	48	0
22	102	1.73	1.02	0.06	49	49	0
23	102	1.73	1.02	0.06	50	50	0
24	102	1.73	1.02	0.06	51	51	0
25	102	1.73	1.08	0.41	52	52	4	BABY SQUEEZE PLACETA
26	102	1.73	1.08	0.41	53	53	4	BABY SQUEEZE PLACETA
27	102	1.73	1.07	0.23	54	54	0
28	102	1.73	1.07	0.23	55	55	0
29	102	1.73	1.07	0.23	56	56	0
30	102	1.73	1.07	0.23	57	57	0
31	103	1.73	1.14	0.15	58	58	0
32	103	1.73	1.14	0.15	59	59	0
33	103	1.73	1.14	0.15	60	60	0
34	103	1.71	0.93	0.1	61	61	4	BABY SQUEEZE PLACETA
35	103	1.68	1.01	0.38	62	62	4	BABY SQUEEZE PLACETA
36	103	1.68	1.01	0.38	63	63	4	BABY SQUEEZE PLACETA
37	103	1.68	1.01	0.38	64	64	4	BABY SQUEEZE PLACETA
38	103	1.68	1.01	0.38	65	65	4	BABY SQUEEZE PLACETA
39	103	1.68	1.01	0.38	66	66	4	BABY SQUEEZE PLACETA
40	103	1.68	1.01	0.38	67	67	4	BABY SQUEEZE PLACETA

## Sheet: Sheet3
Marker	code
baseline	101
hyperoxia	102
recovery	103
reproducibility position1	1.1	1.2	1.3
reproducibility position2	2.1	2.2	2.3
reproducibility position3	3.1	3.2	3.3
situation	code
normal	0
baby move	1	recorded during measurement
contraction	2	recorded during measurement
baby practice breathing	3	recorded during measurement
patient move/probe move/shapechange	4	recorded during measurement
wrong trend	5	determined by analysis code
poor data	6	determined by analysis code
not available or measurement messed up	7	recorded during measurement
bad fitting	8	determined by analysis code
10% different than neighbors	9	determined by analysis code
Situation Code <5	Frames included
Situation Code >=5	Frames excluded
